# Supplementary material
Source: Springer Nature journal article supplement (https://www.springermedizin.de/resource/supplementary/12885_2008_1367_MOESM2_ESM.pdf/9472594)

# Survival

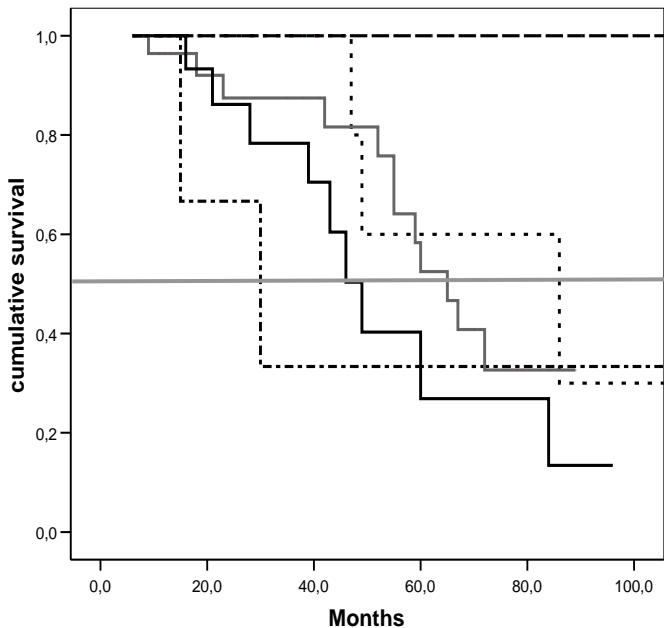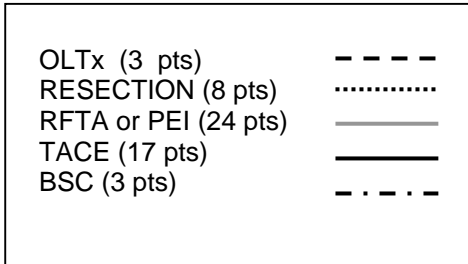

p = n.s.  
Chi<sup>2</sup> = 5.674

Supplement: MOESM2 [file 9472594]
